# Supplementary material for: Long-term administration of vitamin B12 and adenosine triphosphate for idiopathic sudden sensorineural hearing loss: a retrospective study
Source: PeerJ. 2020 Dec 16;8:e10406. doi: 10.7717/peerj.10406 (PMC7749652; doi:10.7717/peerj.10406)
Supplement: Supplemental Information 1 [file peerj-08-10406-s001.xlsx]

## Sheet: Sheet1
Patient No	Sex m:male f:female	Siegel Grade (1/2/3/4)	Initial Grade (1/2/3/4)	Vertigo	Diabetes	Days to initiation of treatment (days)	Age (years)	Initial hearing level (dB SPL)	Averaged hearing thresholds (dB HL) (2 months after onset)	Averaged hearing thresholds (dB HL) (4 months after onset)	Averaged hearing thresholds (dB HL) (6 months after onset)	Hearing thresholds of contralateral ears (dB HL) (6 months after onset)	Hearing recovery (dB HL)	Duration of drug administration (months)	Changes of hearing thresholds in contralateral ears (dB HL) (6 months - 4 months)	Changes of hearing thresholds in contralateral ears (dB HL) (4 months - 2 months)	Changes of hearing thresholds in contralateral ears (dB HL) (2 months - initial)
1	m	1	3	-	-	3	57	75	25	23.75	31.25	23.75	43.75	6	-6.25	3.75	-2.5
2	m	1	1	+	-	12	65	30	27.5	28.75	22.5	21.25	7.5	3	5	0	-6.25
3	f	1	4	+	+	6	64	96.25	8.75	10	6.25	10	90	6	-2.5	3.75	2.5
4	m	1	3	-	-	4	42	86.25	17.5	11.25	11.25	11.25	75	2	-1.25	2.5	0
5	f	1	3	-	-	5	66	68.75	17.5	17.5	17.5	8.75	51.25	2	-2.5	3.75	-1.25
6	m	1	2	-	+	4	43	40	17.5	16.25	17.5	18.75	22.5	1	1.25	2.5	-2.5
7	f	1	3	+	+	3	39	90	15	13.75	17.5	15	72.5	2	-7.5	5	-6.25
8	m	1	2	-	-	6	47	48.75	23.75	18.75	12.5	8.75	36.25	2	-5	-2.5	-2.5
9	f	1	3	-	-	5	74	85	18.75	15	12.5	11.25	72.5	3	1.25	0	6.25
10	m	1	3	-	+	5	74	88.75	27.5	21.25	21.25	15	67.5	3	-2.5	0	2.5
11	f	1	2	+	-	4	67	53.75	30	23.75	22.5	16.25	31.25	1	0	-3.75	2.5
12	f	1	1	+	-	7	69	36.25	17.5	21.25	20	17.5	16.25	3	-5	8.75	-5
13	f	1	3	-	-	2	79	66.25	23.75	23.75	18.75	32.5	47.5	4	0	1.25	0
14	f	1	3	+	-	5	61	65	30	28.75	23.75	16.25	41.25	3	2.5	0	-5
15	m	1	1	-	+	3	44	45	16.25	16.25	16.25	110	28.75	1	-3.75	-1.25	0
16	f	1	3	-	+	4	46	80	11.25	16.25	12.5	11.25	67.5	1	-1.25	2.5	2.5
17	m	1	3	-	-	5	47	53.75	38.75	28.75	21.25	17.5	32.5	3	6.25	-3.75	-2.5
18	m	1	3	-	-	6	44	73.75	30	21.25	18.75	8.75	55	3	-2.5	6.25	-3.75
19	f	1	3	-	-	2	50	68.75	16.25	21.25	20	15	48.75	1	2.5	1.25	1.25
20	f	1	2	-	-	2	35	47.5	16.25	10	13.75	10	33.75	12	6.25	-5	0
21	m	1	3	+	-	3	14	68.75	33.75	35	25	5	43.75	4	5	-5	5
22	f	1	2	+	-	1	66	41.25	20	20	22.5	11.25	18.75	4	6.25	0	-6.25
23	f	1	2	+	-	2	21	47.5	23.75	27.5	23.75	10	23.75	6	-1.25	-2.5	-2.5
24	m	2	2	-	-	9	52	47.5	32.5	26.25	25	15	22.5	5	2.5	-1.25	-1.25
25	f	2	3	+	-	5	65	70	27.5	32.5	37.5	12.5	32.5	3	-3.75	0	2.5
26	f	2	4	+	-	1	32	103.75	50	41.25	40	17.5	63.75	6	-1.25	-2.5	5
27	m	2	3	-	+	1	78	82.5	50	43.75	47.5	36.25	35	4	1.25	1.25	-3.75
28	f	2	3	-	+	2	66	83.75	33.75	33.75	36.25	25	47.5	2	-1.25	2.5	2.5
29	m	2	3	-	-	5	69	72.5	28.75	28.75	31.25	22.5	41.25	2	8.75	-8.75	3.75
30	f	2	3	-	-	5	46	72.5	45	46.25	41.25	16.25	31.25	4	5	-10	1.25
31	m	2	3	-	-	8	59	72.5	35	37.5	35	28.75	37.5	3	-1.25	6.25	-6.25
32	f	2	3	-	+	5	63	70	42.5	38.75	38.75	22.5	31.25	3	-2.5	2.5	7.5
33	m	2	3	+	-	4	76	81.25	33.75	33.75	33.75	23.75	47.5	2	6.25	-6.25	0
34	f	2	2	+	-	1	41	60	22.5	21.25	25	13.75	35	3	-1.25	-2.5	8.75
35	f	2	3	-	+	1	64	70	45	43.75	42.5	22.5	27.5	3	-1.25	-2.5	6.25
36	m	2	2	-	-	1	62	50	35	31.25	33.75	26.25	16.25	4	-2.5	3.75	1.25
37	f	2	2	-	+	1	61	53.75	23.75	37.5	33.75	12.5	20	4	0	6.25	-2.5
38	m	2	2	-	+	15	63	56.25	31.25	27.5	28.75	18.75	27.5	3	2.5	0	7.5
39	m	3	3	-	+	3	69	82.5	45	40	37.5	38.75	45	6	-1.25	0	-2.5
40	m	3	4	+	-	1	64	110	77.5	82.5	75	30	35	12	0	1.25	5
41	m	3	4	-	-	1	81	92.5	70	62.5	58.75	16.25	33.75	3	-5	0	3.75
42	m	3	4	+	-	2	38	101.25	61.25	63.75	57.5	20	43.75	7	-1.25	5	7.5
43	m	3	4	+	-	3	35	102.5	77.5	62.5	63.75	12.5	38.75	6	-2.5	3.75	1.25
44	m	3	4	+	-	6	74	100	60	62.5	67.5	18.75	32.5	2	1.25	0	0
45	m	3	4	+	+	1	36	101.25	60	63.75	65	2.5	36.25	3	-5	0	0
46	f	3	4	+	-	1	59	97.5	57.5	50	50	10	47.5	4	-1.25	3.75	-2.5
47	m	3	4	+	-	1	42	97.5	55	48.75	50	6.25	47.5	9	-1.25	-1.25	1.25
48	m	3	4	+	+	3	55	110	71.25	70	63.75	12.5	46.25	6	-10	5	0
49	m	3	4	-	+	2	38	93.75	53.75	52.5	48.75	12.5	45	5	-2.5	0	1.25
50	f	3	4	+	+	6	75	110	85	70	72.5	30	37.5	7	1.25	-6.25	13.75
51	f	3	3	+	-	1	48	90	63.75	60	58.75	8.75	31.25	4	-3.75	-1.25	1.25
52	m	3	3	-	-	3	78	83.75	53.75	48.75	53.75	37.5	30	3	1.25	0	2.5
53	m	3	4	-	-	1	81	106.25	83.75	77.5	73.75	63.75	32.5	5	-2.5	-2.5	6.25
54	m	3	3	+	-	1	58	87.5	77.5	56.25	55	55	32.5	6	1.25	-5	3.75
55	m	3	3	+	-	8	56	88.75	50	46.25	45	15	43.75	4	-3.75	2.5	-5
56	m	3	4	+	-	2	66	110	72.5	65	72.5	20	37.5	3	1.25	-1.25	0
57	m	3	4	+	-	1	33	110	67.5	63.75	65	15	45	5	0	1.25	-3.75
58	m	3	4	-	-	3	87	105	75	67.5	68.75	52.5	36.25	6	2.5	-3.75	2.5
59	f	3	4	-	-	1	44	110	78.75	73.75	76.25	7.5	33.75	5	1.25	2.5	-2.5
60	m	3	4	-	+	1	70	110	75	76.25	75	33.75	35	3	1.25	-1.25	1.25
61	m	3	3	+	-	5	43	103.75	77.5	71.25	66.25	7.5	37.5	3	1.25	-5	3.75
62	f	3	4	-	-	1	73	103.75	77.5	67.5	70	41.25	33.75	7	1.25	0	-1.25
63	m	3	4	-	-	1	49	106.25	62.5	55	52.5	11.25	53.75	2	-1.25	1.25	-2.5
64	f	3	4	+	-	3	55	110	75	65	68.75	21.25	41.25	4	0	1.25	-1.25
65	f	3	4	+	-	11	16	103.75	78.75	72.5	76.25	-1.25	27.5	6	2.5	-2.5	-1.25
66	m	3	4	+	+	2	55	90	81.25	71.25	75	28.75	15	4	30	6.25	-35
67	f	3	4	+	+	3	67	100	81.25	80	77.5	35	22.5	4	0	-3.75	3.75
68	m	3	3	-	+	8	68	62.5	51.25	46.25	46.25	13.75	16.25	3	-3.75	2.5	-3.75
69	m	3	3	-	-	3	74	77.5	53.75	48.75	52.5	28.75	25	10	-6.25	3.75	-1.25
70	m	3	4	+	+	2	66	108.75	110	87.5	82.5	20	26.25	3	5	-5	0
71	f	3	3	+	+	0	67	110	110	86.25	83.75	25	26.25	7	1.25	2.5	-6.25
72	m	3	3	+	+	2	43	97.5	83.75	80	81.25	8.75	16.25	6	-2.5	3.75	3.75
73	f	3	4	-	-	5	66	93.75	70	63.75	68.75	33.75	25	2	1.25	-3.75	3.75
74	f	3	4	+	-	4	75	110	90	86.25	88.75	45	21.25	3	-1.25	0	1.25
75	f	3	4	+	+	1	83	101.25	81.25	76.25	75	32.5	26.25	3	-1.25	-3.75	0
76	m	3	4	+	+	1	71	110	101.25	90	88.75	22.5	21.25	2	2.5	-2.5	0
77	f	3	3	-	+	4	82	87.5	65	60	61.25	30	26.25	9	2.5	1.25	-3.75
78	f	3	3	-	-	2	74	73.75	57.5	57.5	52.5	11.25	21.25	4	-3.75	1.25	-1.25
79	f	3	4	+	-	0	55	110	101.25	86.25	88.75	37.5	21.25	3	0	5	-3.75
80	m	3	4	+	-	9	55	80	71.25	66.25	65	6.25	15	12	-2.5	-2.5	-5
81	f	3	4	+	-	15	60	106.25	73.75	81.25	77.5	38.75	28.75	5	-1.25	1.25	-2.5
82	f	3	4	+	+	6	67	98.75	83.75	85	80	8.75	18.75	6	-2.5	1.25	3.75
83	m	3	3	-	-	3	44	73.75	47.5	47.5	46.25	8.75	27.5	4	-2.5	1.25	0
84	m	3	4	+	+	1	34	110	87.5	86.25	87.5	13.75	22.5	1	1.25	-1.25	1.25
85	m	4	4	+	+	1	55	110	102.5	98.75	100	11.25	10	6	1.25	2.5	-2.5
86	f	4	3	-	-	6	49	60	52.5	51.25	50	21.25	10	4	0	2.5	-2.5
87	f	4	3	-	-	3	83	88.75	83.75	75	76.25	37.5	12.5	3	1.25	0	1.25
88	f	4	4	+	-	4	69	110	95	92.5	96.25	11.25	13.75	2	1.25	-5	-7.5
89	m	4	1	-	+	13	56	36.25	43.75	30	26.25	13.75	10	6	1.25	-6.25	1.25
90	f	4	3	-	-	5	74	76.25	77.5	83.75	82.5	37.5	-6.25	7	-3.75	3.75	2.5
91	m	4	4	+	-	1	62	110	110	105	108.75	41.25	1.25	5	2.5	-3.75	1.25
92	m	4	1	-	-	3	36	37.5	42.5	35	32.5	2.5	5	8	3.75	-3.75	2.5
93	m	4	2	-	+	7	42	48.75	40	43.75	42.5	13.75	6.25	4	1.25	1.25	0
94	m	4	3	-	-	3	61	67.5	65	62.5	63.75	11.25	3.75	7	1.25	2.5	0
95	m	4	2	-	-	26	79	50	41.25	47.5	47.5	36.25	2.5	2	-2.5	0	-2.5
96	m	4	4	-	-	3	89	97.5	96.25	96.25	110	71.25	-12.5	2	-6.25	2.5	-2.5
97	m	4	2	-	-	5	21	51.25	62.5	60	56.25	10	-5	7	0	-2.5	1.25
98	f	4	1	-	-	4	62	37.5	36.25	37.5	37.5	20	0	3	-1.25	1.25	-1.25
99	m	4	2	+	-	4	60	47.5	48.75	71.25	62.5	27.5	-15	6	5	-2.5	1.25
100	m	4	1	+	-	6	20	23.75	28.75	27.5	23.75	6.25	0	4	-5	-1.25	5
101	f	4	2	-	-	17	69	53.75	42.5	43.75	45	18.75	8.75	8	-3.75	0	1.25
102	m	4	4	-	+	2	57	103.75	93.75	91.25	95	11.25	8.75	3	1.25	-1.25	-2.5
103	f	4	3	-	-	2	73	67.5	61.25	61.25	58.75	25	8.75	5	-2.5	0	-1.25
104	m	4	1	-	-	4	72	30	27.5	31.25	30	16.25	0	2	0	-5	-2.5
105	m	4	3	-	-	3	68	68.75	62.5	62.5	62.5	11.25	6.25	2	3.75	-6.25	1.25
106	f	4	3	+	-	6	34	110	110	110	110	7.5	0	12	0	1.25	0
107	m	4	4	+	-	4	76	106.25	108.75	107.5	108.75	83.75	-2.5	2	3.75	-5	-1.25
108	m	4	3	-	-	3	73	83.75	81.25	82.5	81.25	31.25	2.5	5	-6.25	13.75	-11.25
109	m	4	2	-	-	8	71	57.5	55	60	56.25	31.25	1.25	3	-5	-6.25	-3.75
110	m	4	4	+	+	12	74	110	103.75	102.5	107.5	33.75	2.5	12	-12.5	2.5	-1.25
111	f	4	3	-	-	2	61	60	63.75	55	55	8.75	5	3	-2.5	-3.75	-1.25
112	m	4	4	+	-	7	31	91.25	110	110	110	11.25	-18.75	3	-3.75	2.5	1.25
113	f	4	3	-	-	5	66	68.75	65	61.25	67.5	18.75	1.25	4	1.25	1.25	-3.75
114	f	4	4	+	-	9	70	108.75	103.75	103.75	100	22.5	8.75	3	-2.5	1.25	0
115	m	4	4	+	-	1	27	95	110	110	110	7.5	-15	2	-3.75	2.5	-3.75
116	f	4	4	+	-	2	55	86.25	76.25	72.5	73.75	23.75	12.5	8	-2.5	0	2.5
117	f	4	2	+	-	6	77	60	43.75	46.25	46.25	52.5	13.75	3	3.75	-7.5	3.75
